# Supplementary material for: Luminescent film with terbium-complex-bridged polysilsesquioxanesElectronic supplementary information (ESI) available: IR, UV-Vis and excitation spectra and decay curves. See http://www.rsc.org/suppdata/nj/b2/b206815j/
Source: Royal Society of Chemistry journal article supplement (doi:10.1039/b206815j), 2002-11-22
Supplement: b206815j.doc [file b206815j.doc]

**(Supporting information)**

### Captions

Fig. 2 IR spectra of a) DPS and b) hybrid thin film.

Fig. 3 UV-Vis spectra of a) DPS and b) hybrid thin film.

Fig. 4 Excitation spectra of a)the hybrid film and b) the pure Tb-DPS complex in DMF (monitoring the 5D4→7 F5 transition at 545 nm).

Fig.5 5D4 decay curve of Tb3+ excited at 269 nm in the hybrid thin film.

Fig. 6 5D4 decay curve of Tb3+ excited at 282 nm in the pure Tb-DPS complex

# Fig. 2

Fig .3

## Fig. 4

# Fig. 5

# Fig. 6
